# Supplementary material
Source: PubMed Central journal article supplement (PMC8506580)
Supplement: media-1.pdf [file media-1.pdf]

**A** MOI 2 pfu/cell

SARS-CoV-2 N DAPI

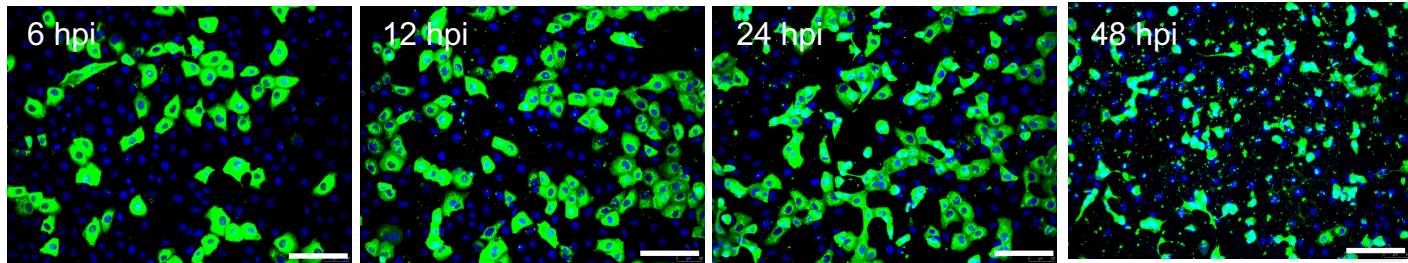

**B** RNA integrity

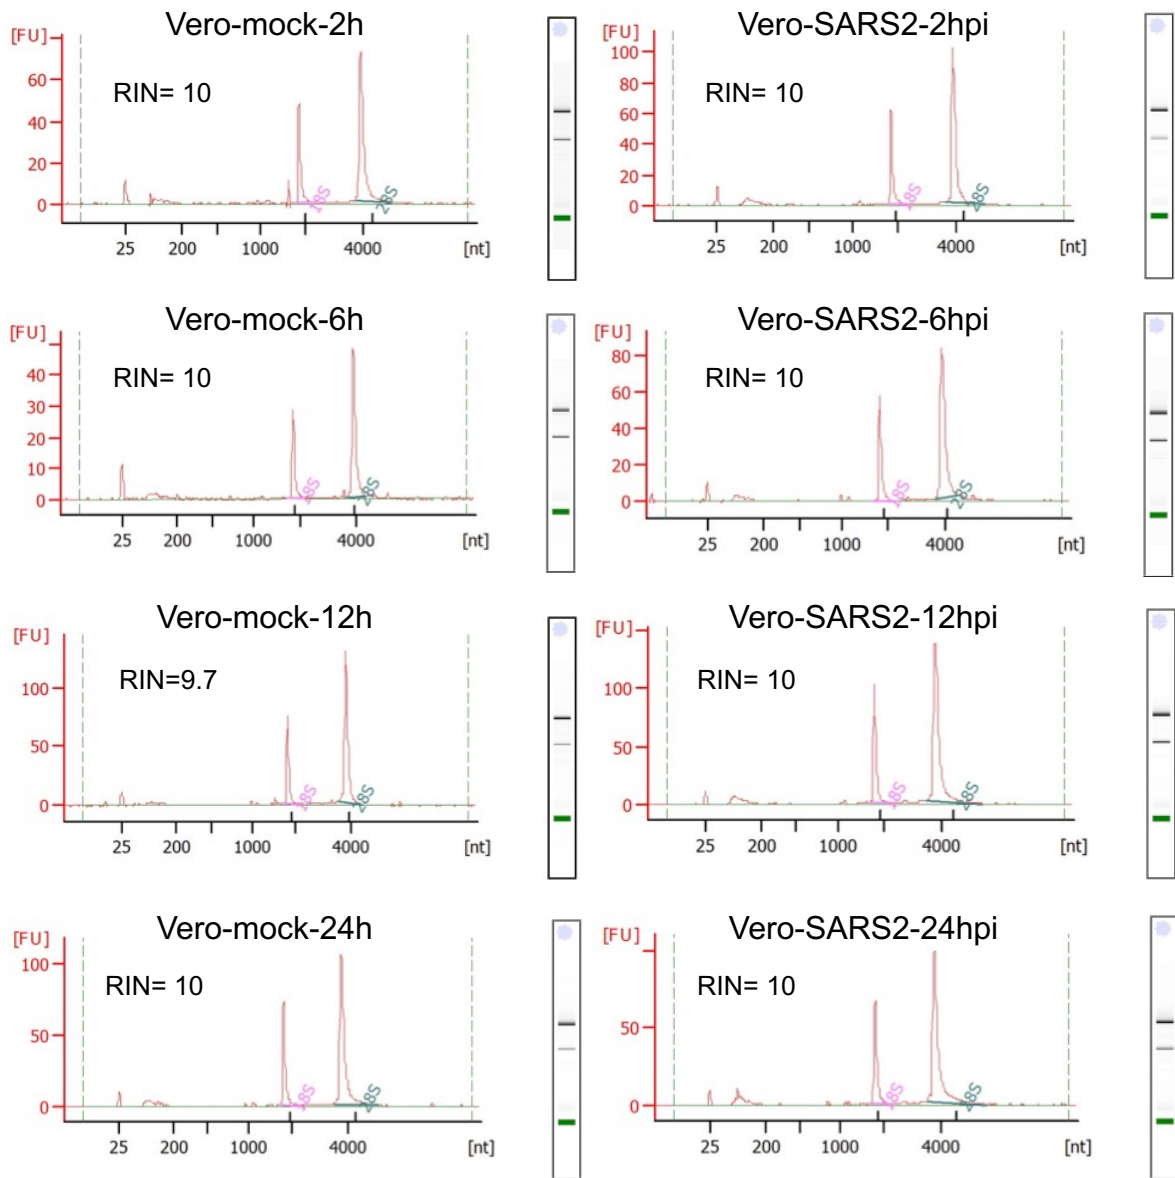

**Figure S1**

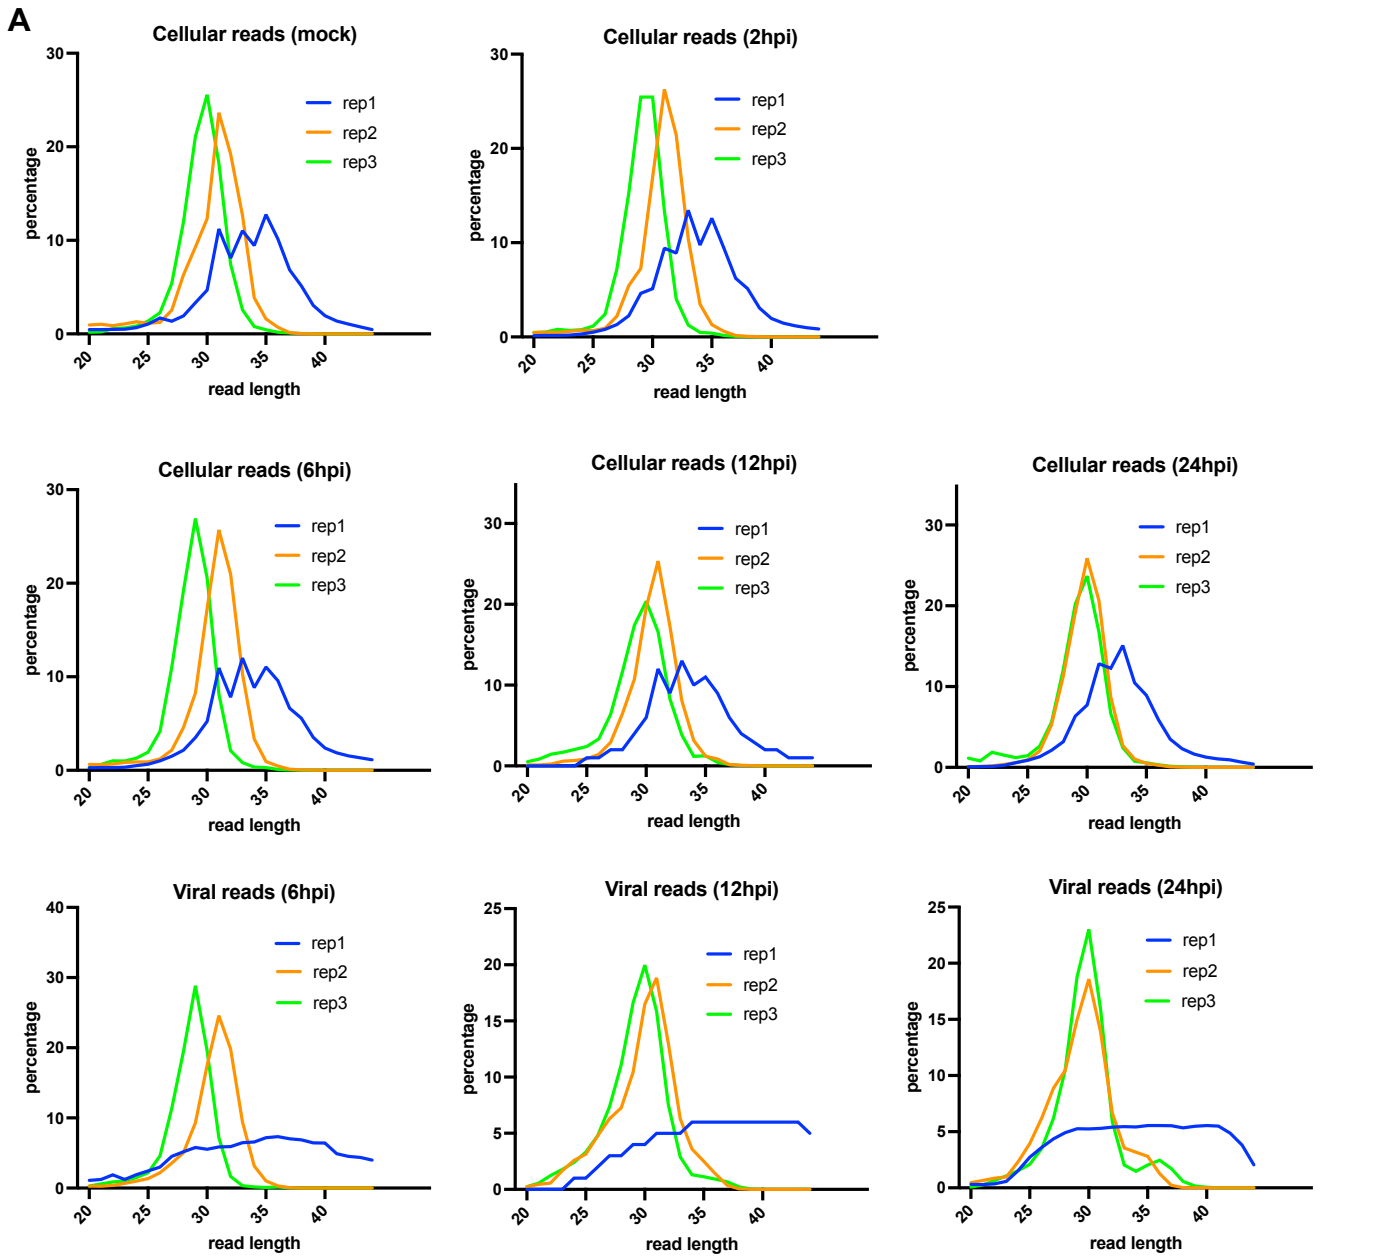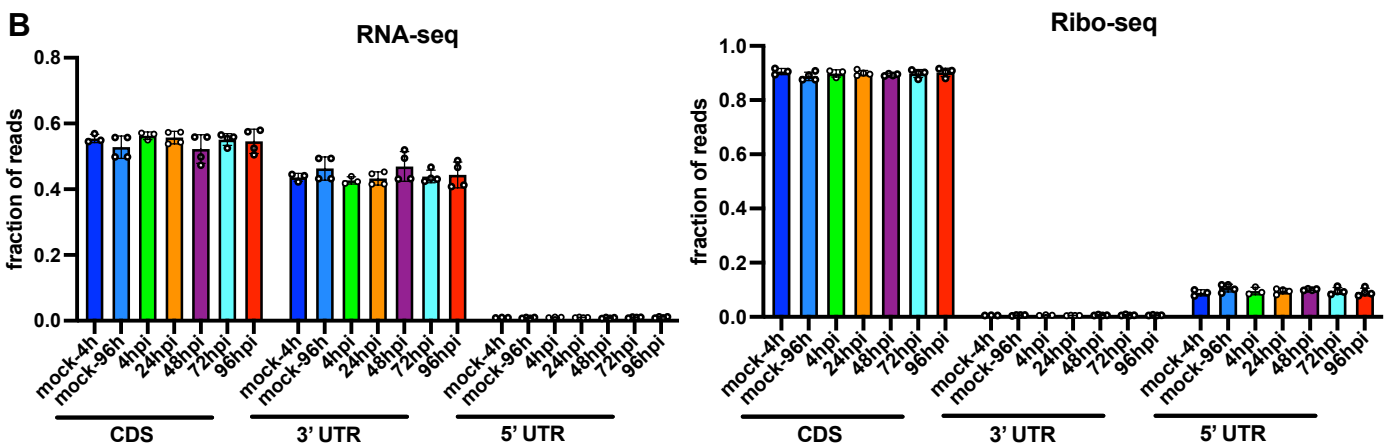

Figure S2

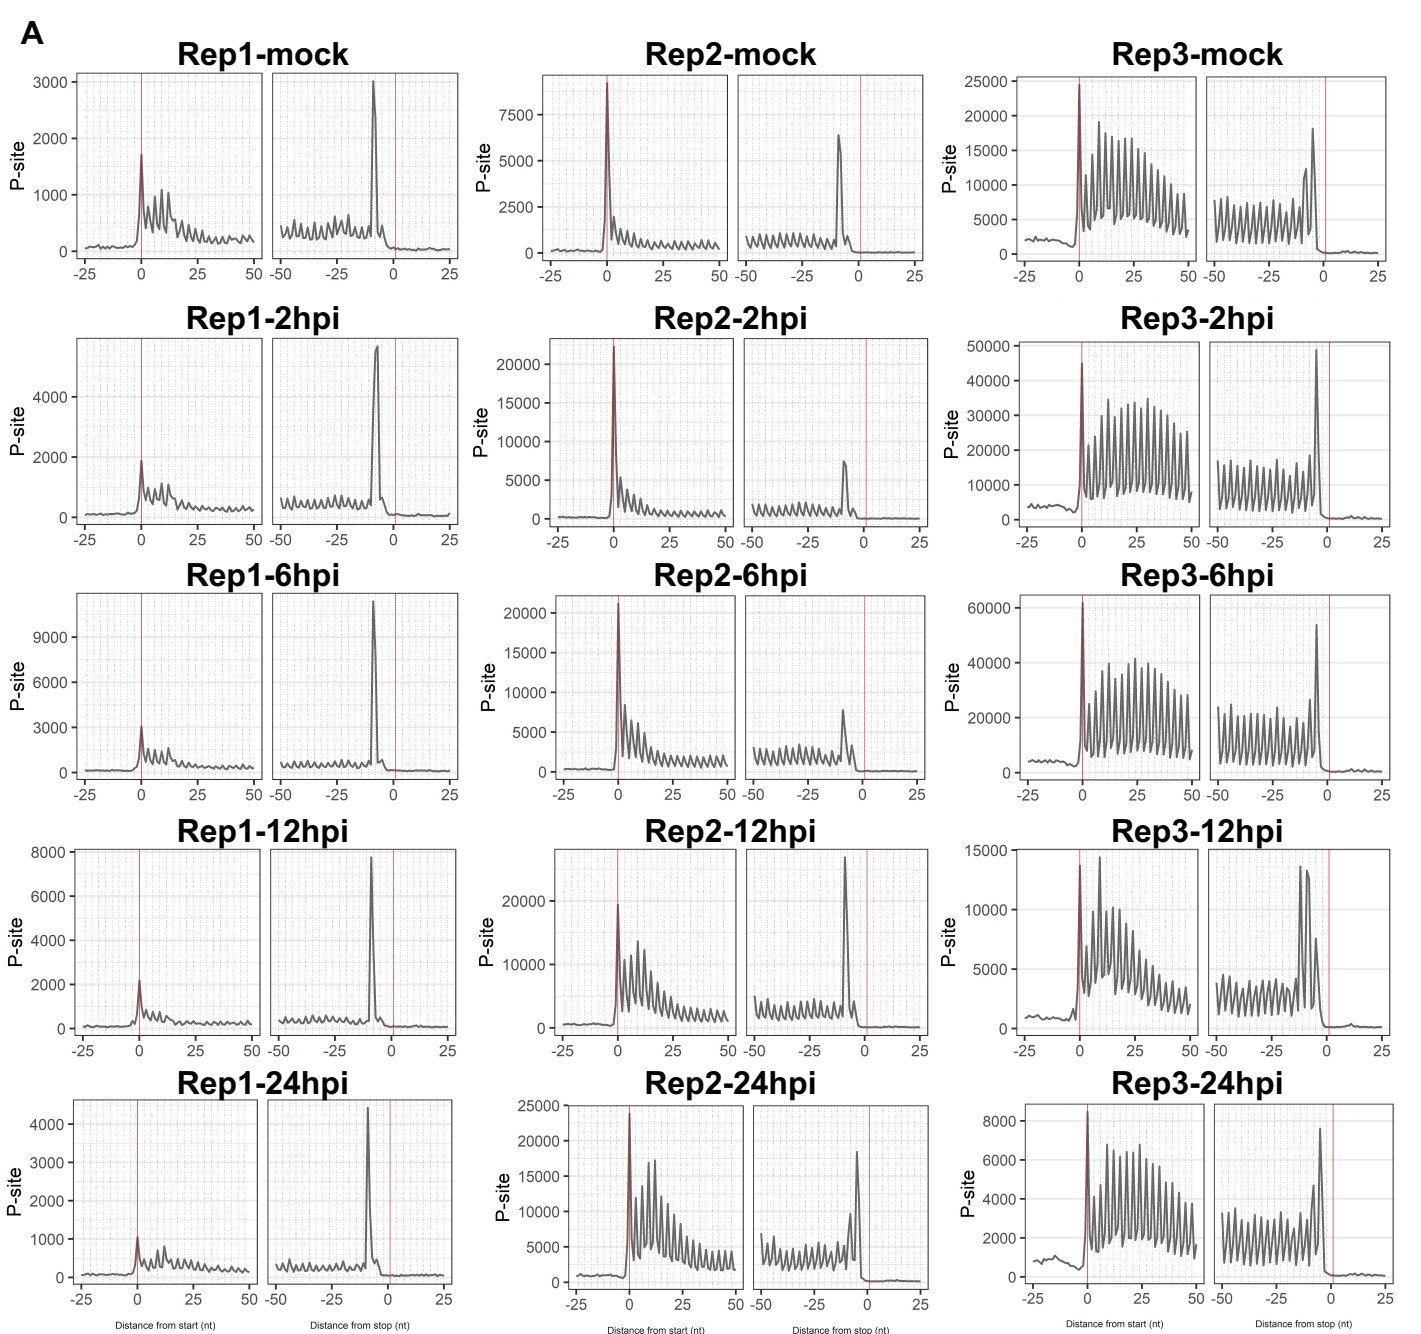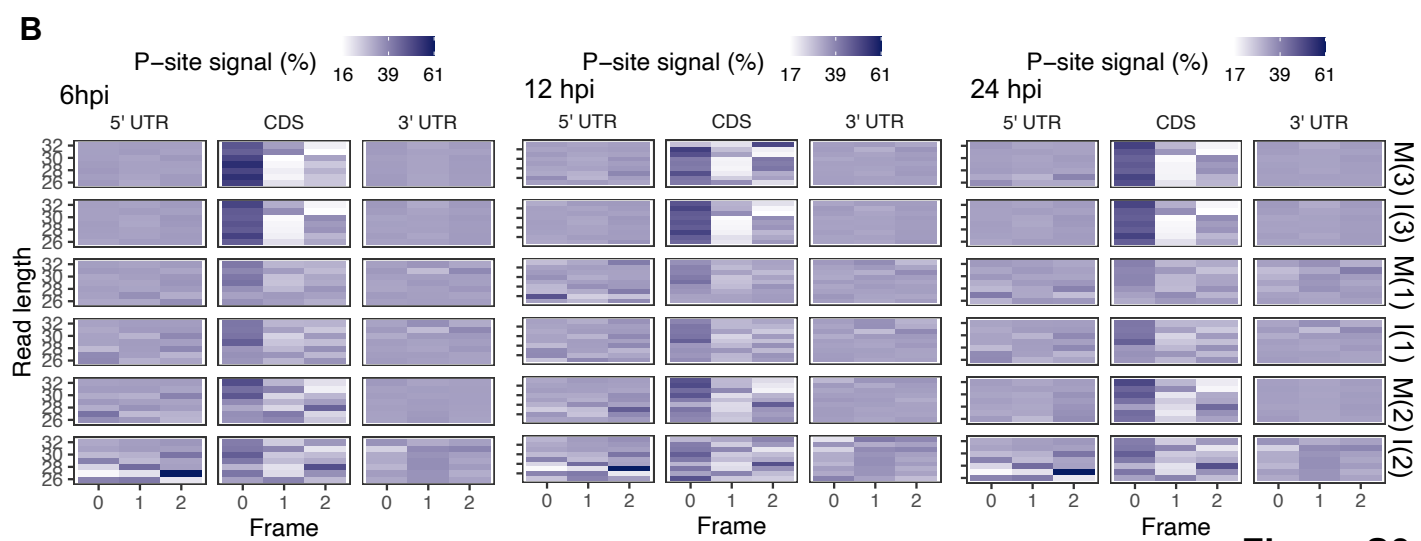

**Figure S3**

## Rep 1

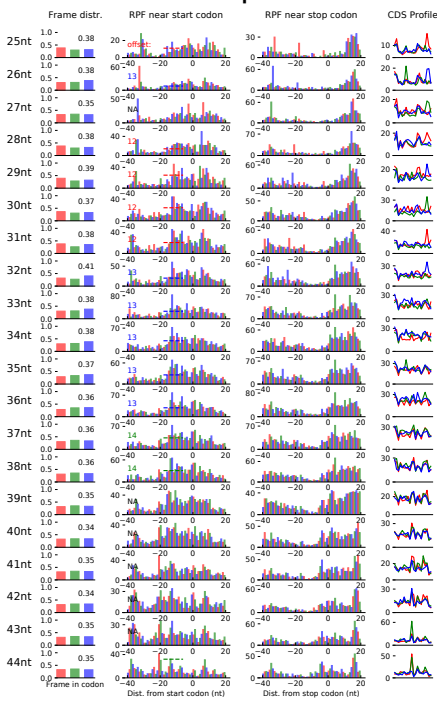

## Rep 2

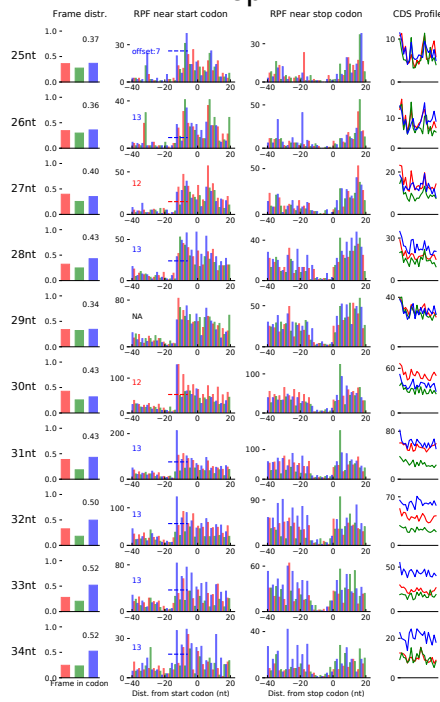

## Rep 3

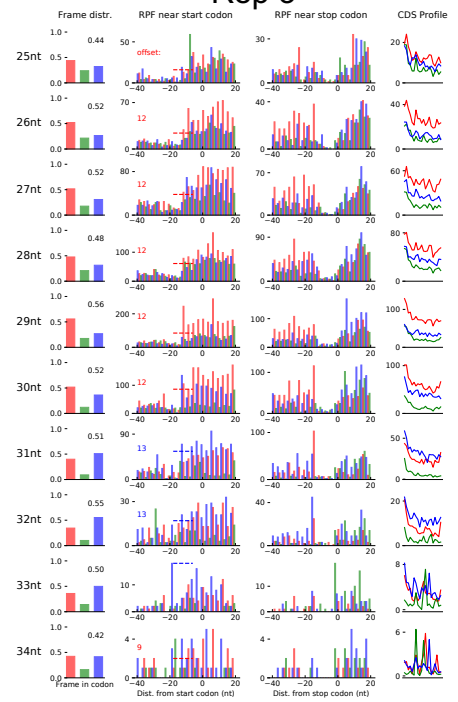

Figure S4

**A**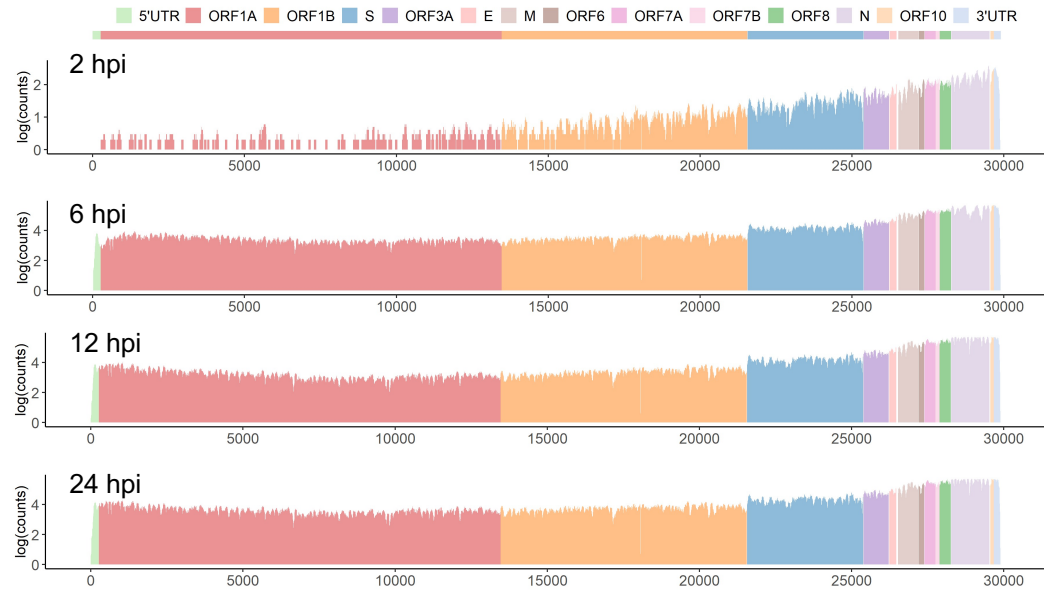

RNA-seq (log scale)

**B**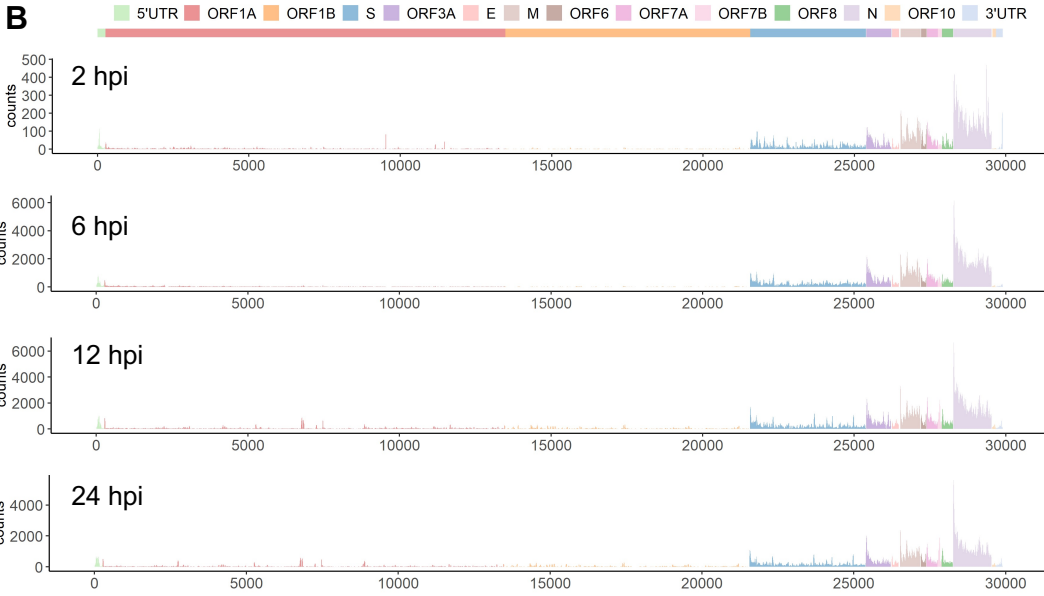

Ribo-seq (linear scale)

**Figure S5**

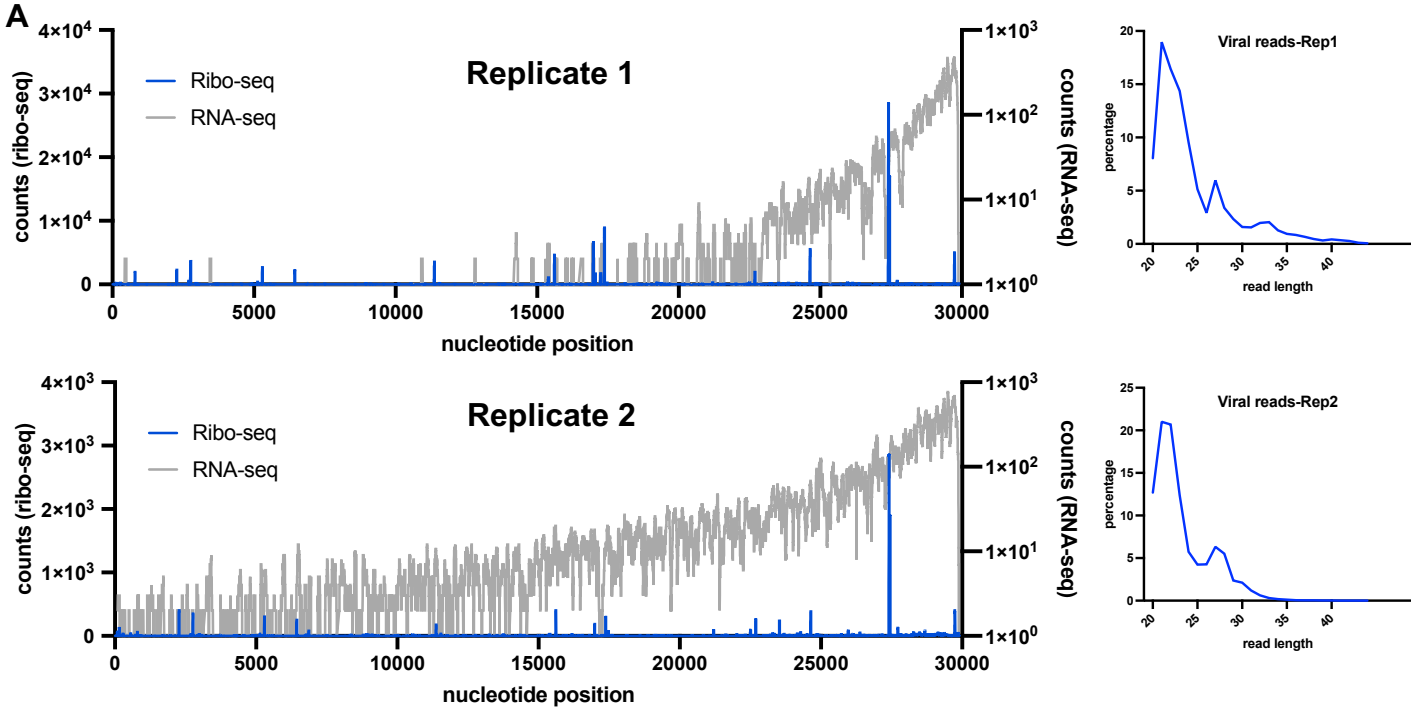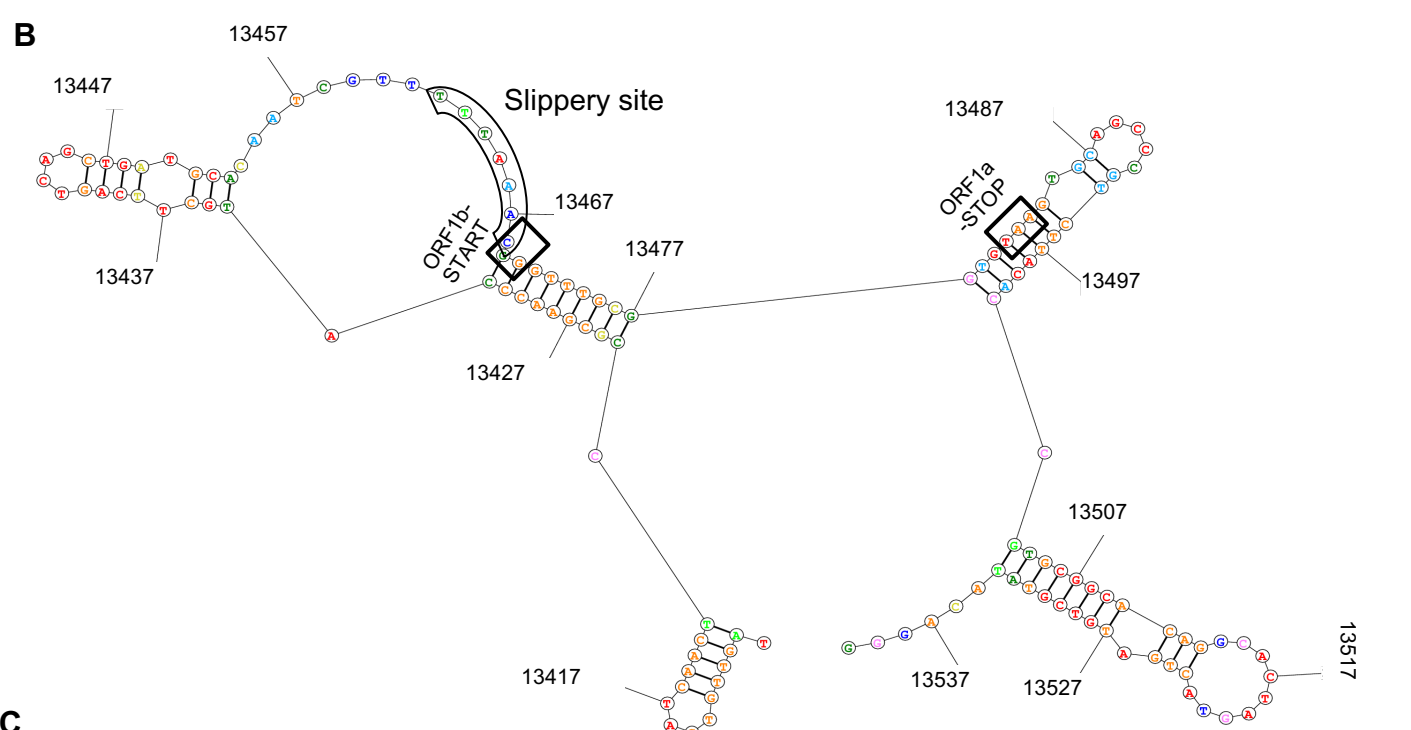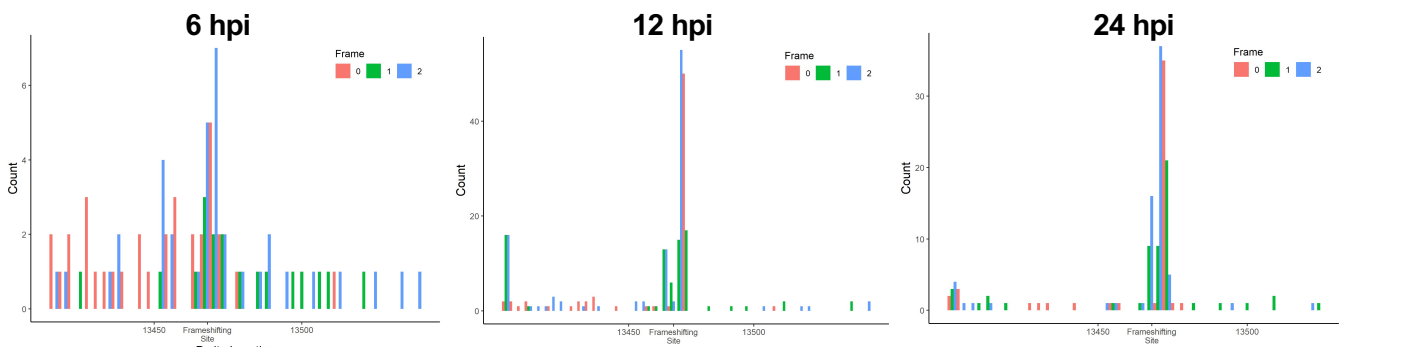

**Figure S6**

### S-6hpi

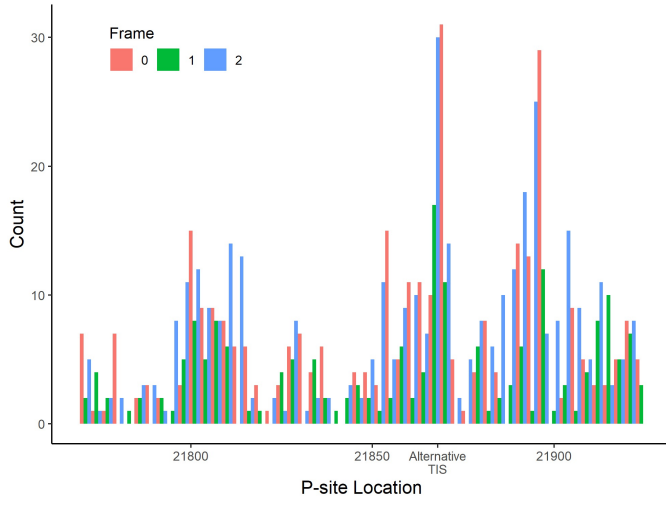

### E-6hpi

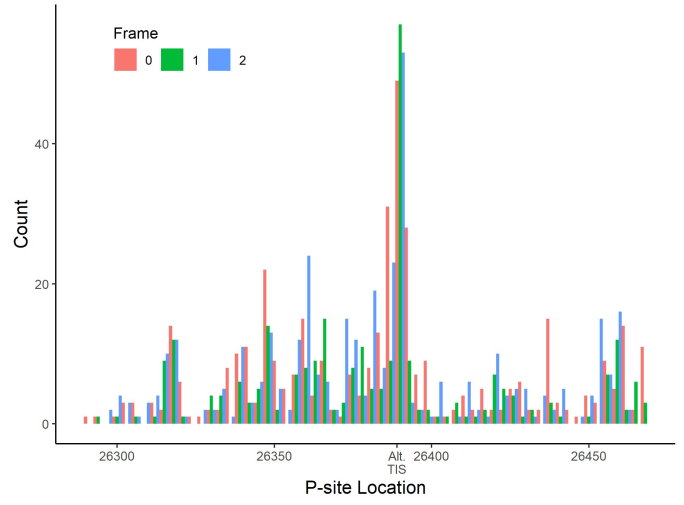

### M-6hpi

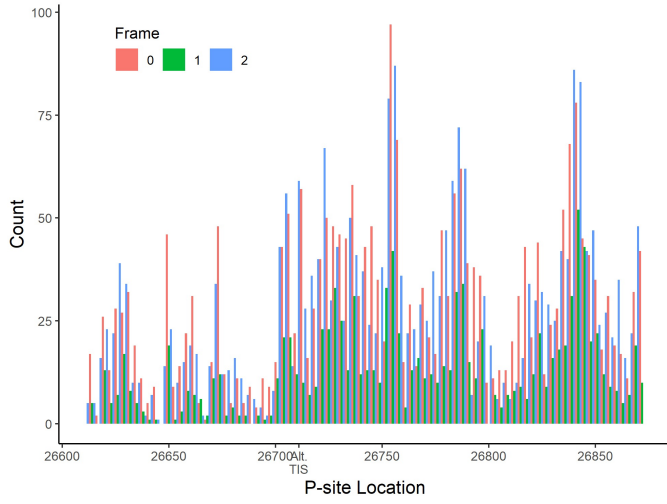

### M-24hpi

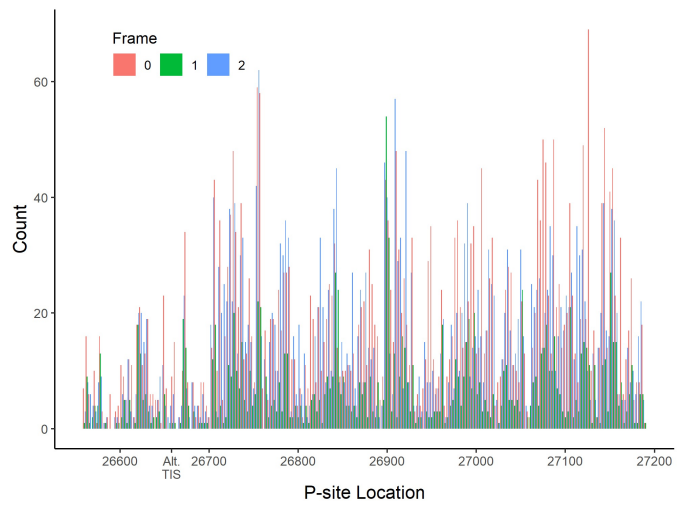

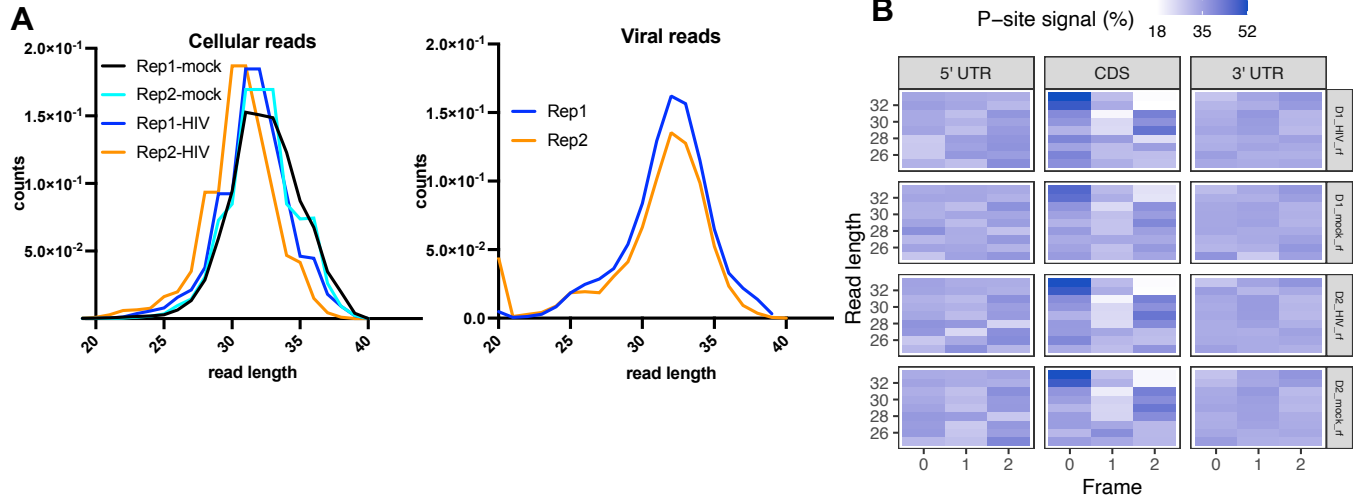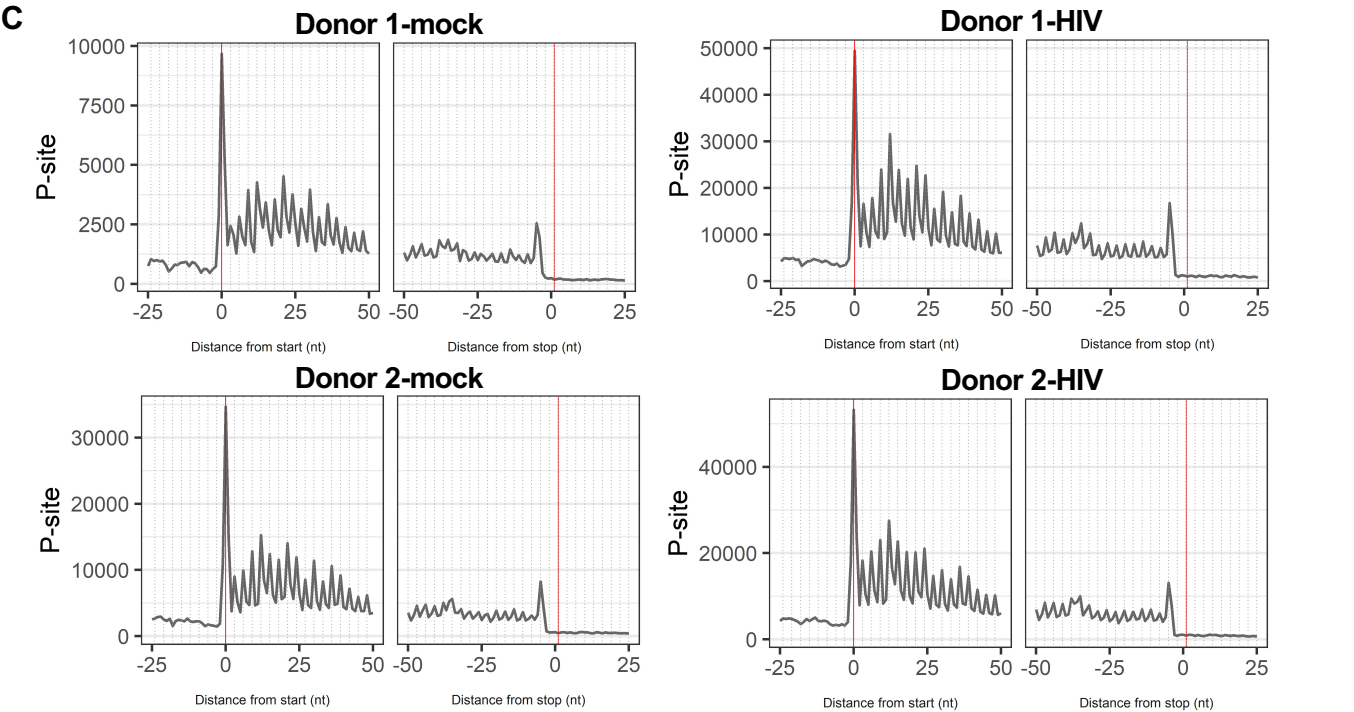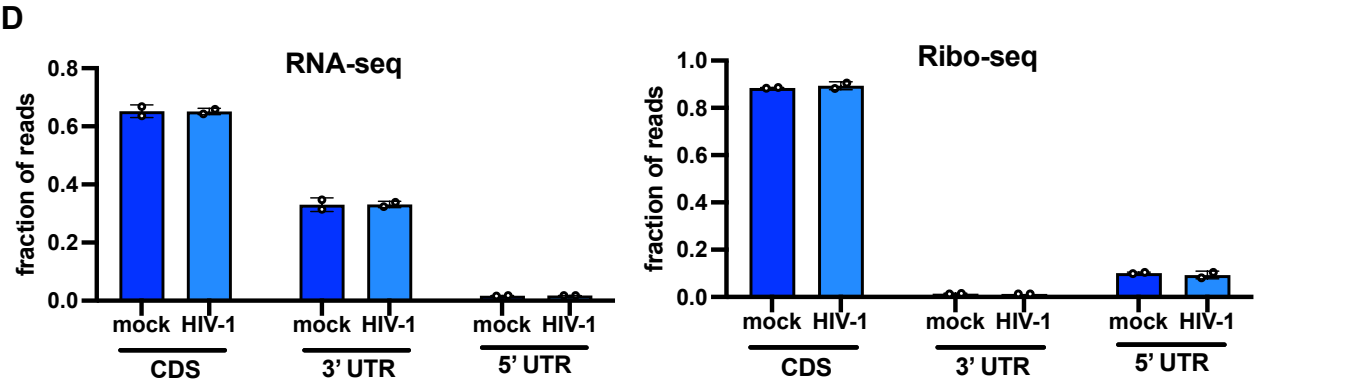

Figure S8



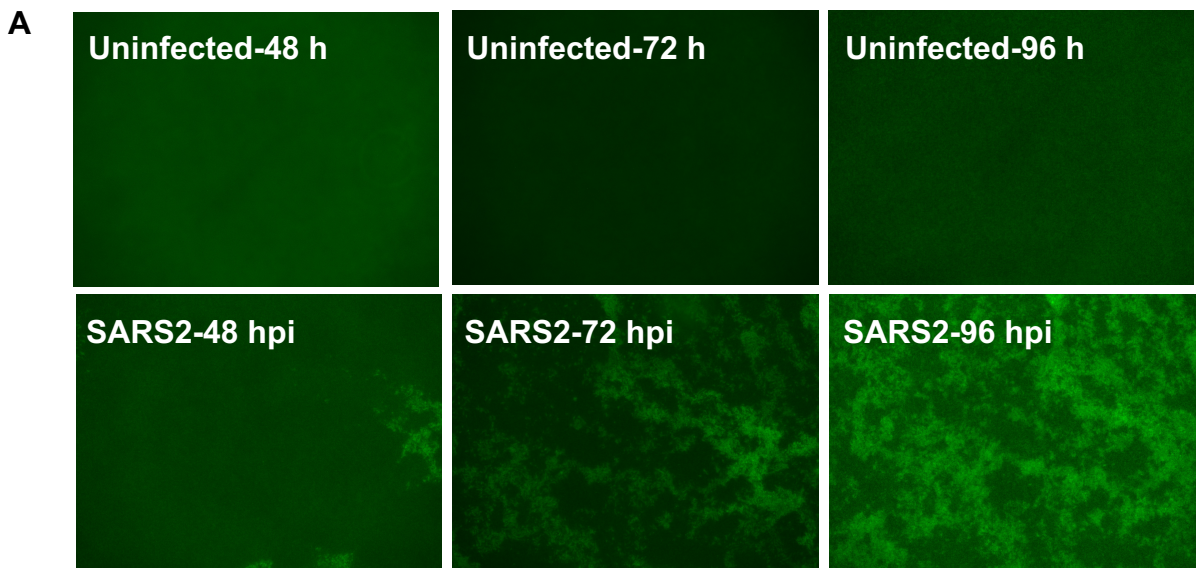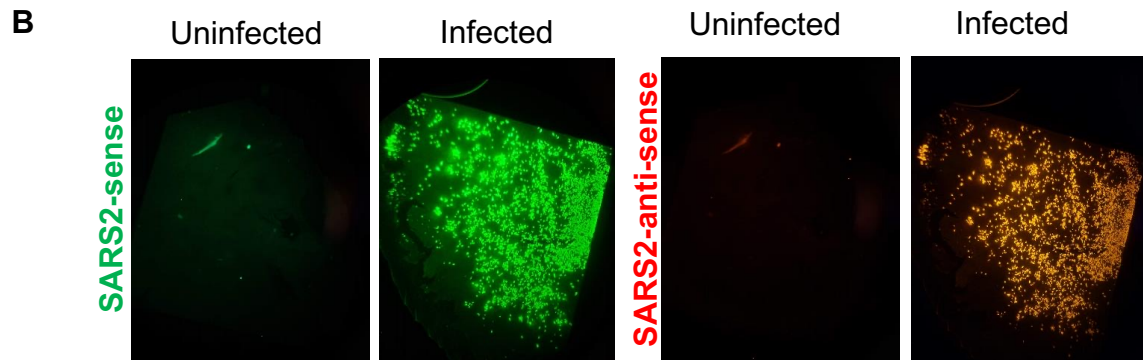

Figure S9

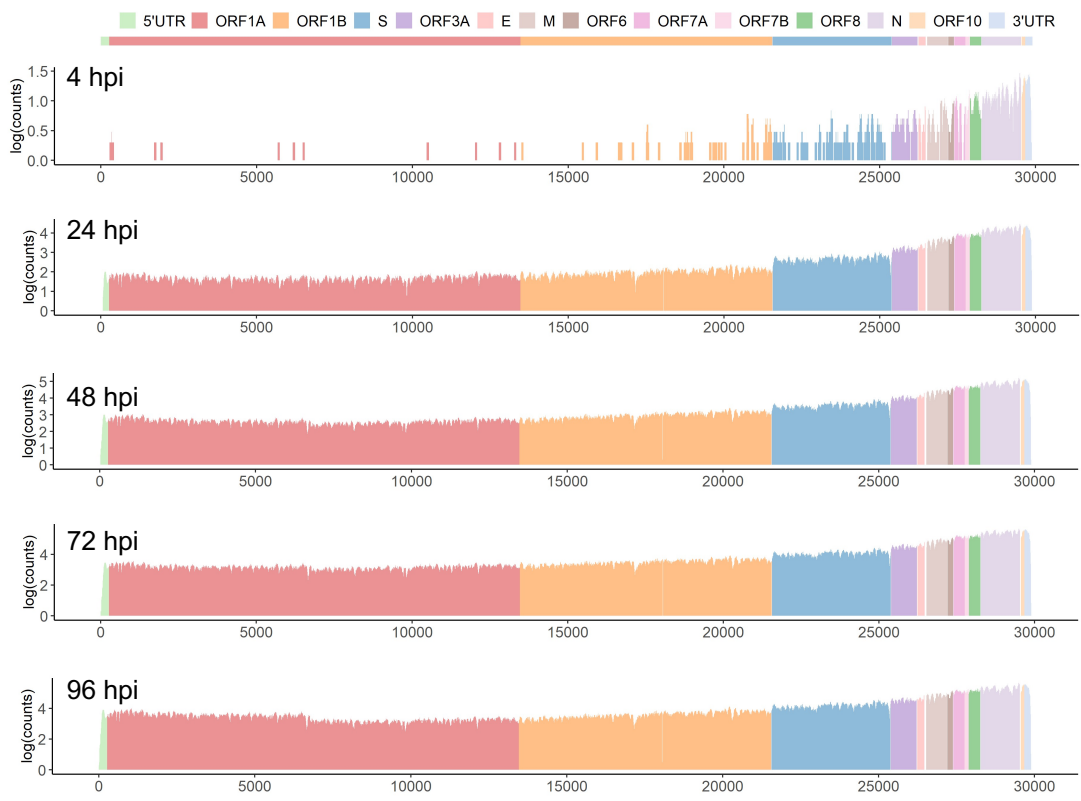

RNA-seq (log scale)

Figure S10

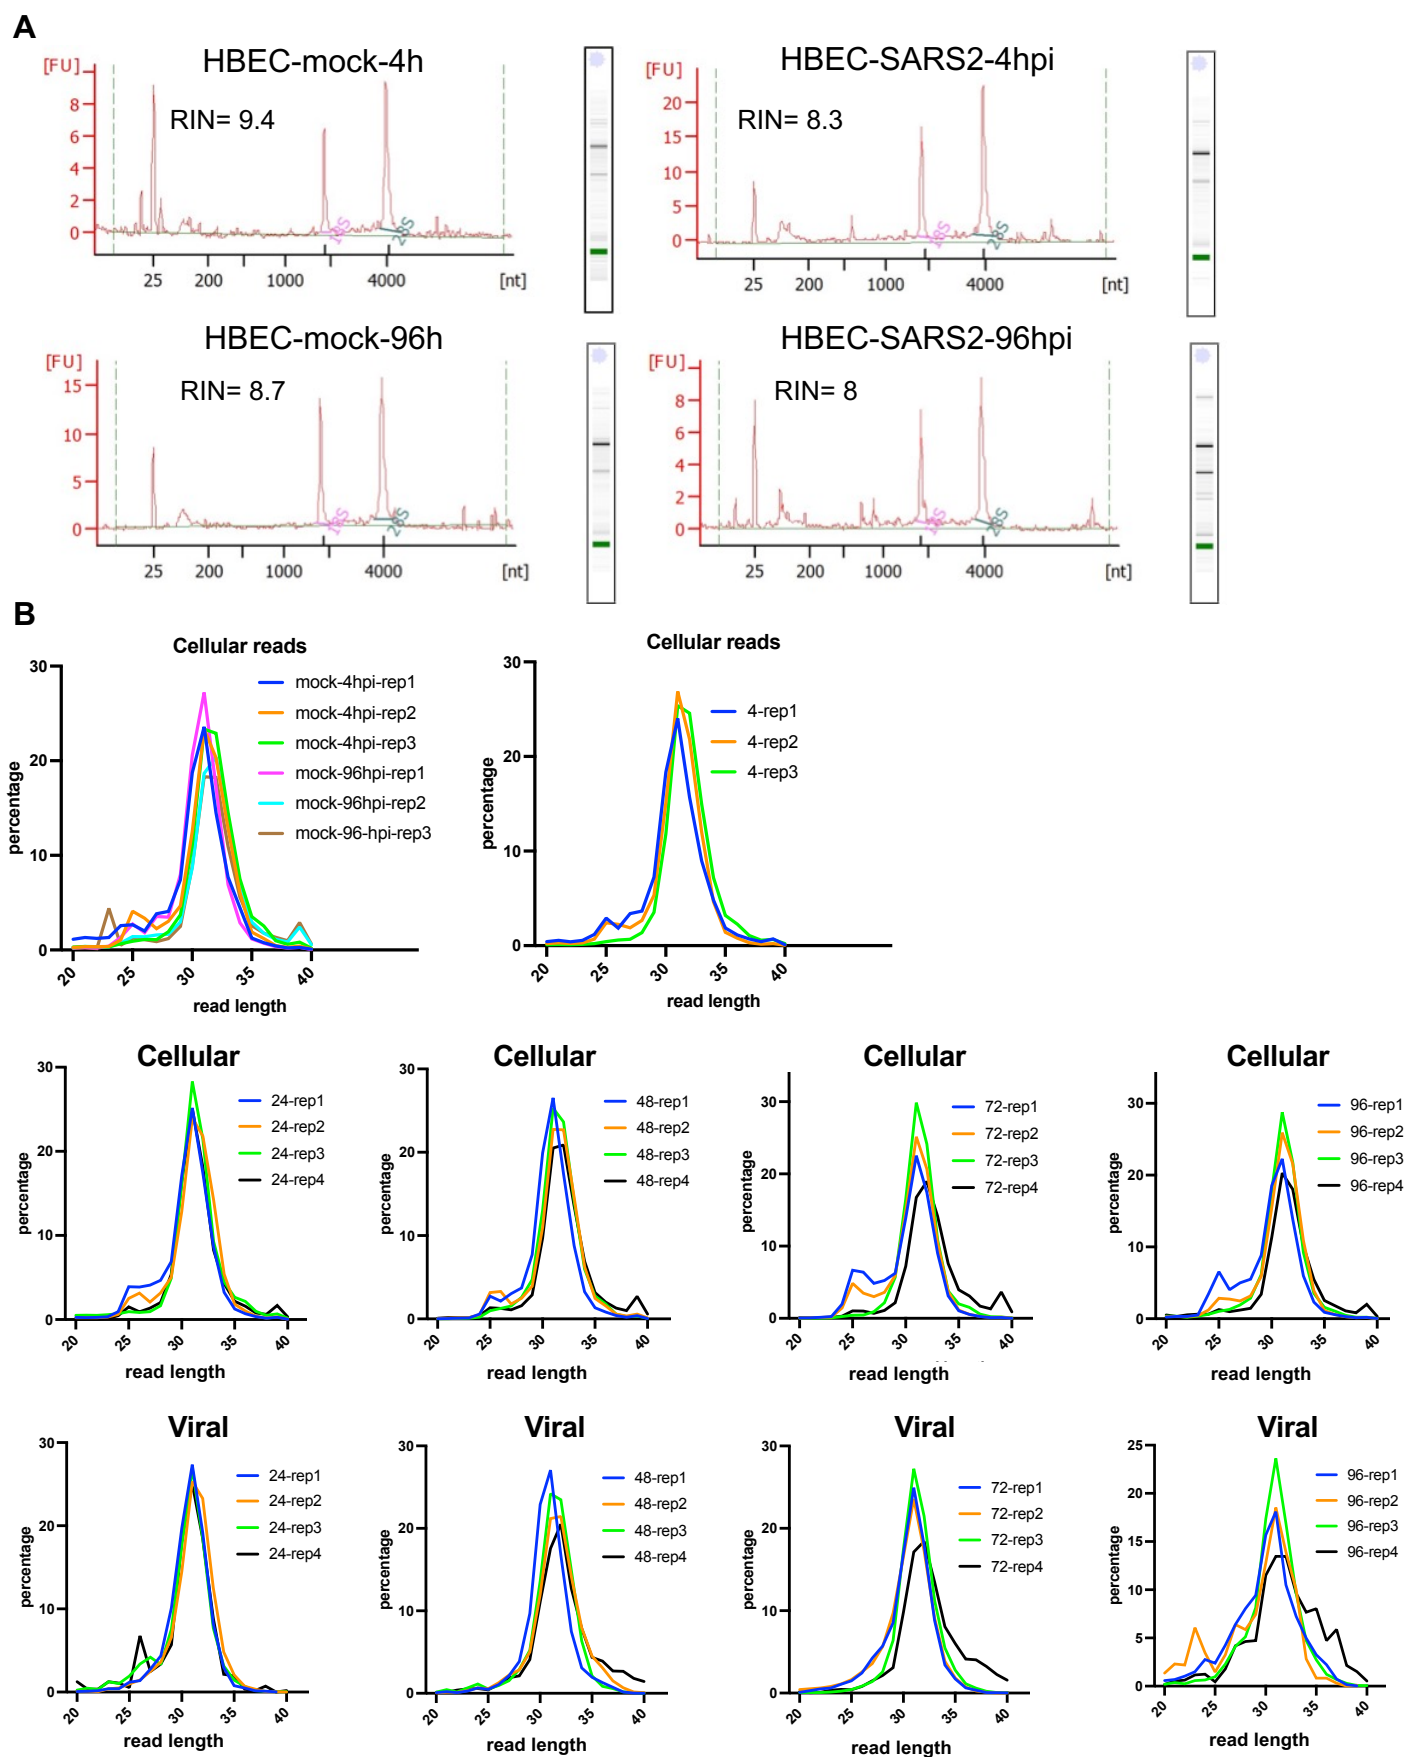

Figure S11

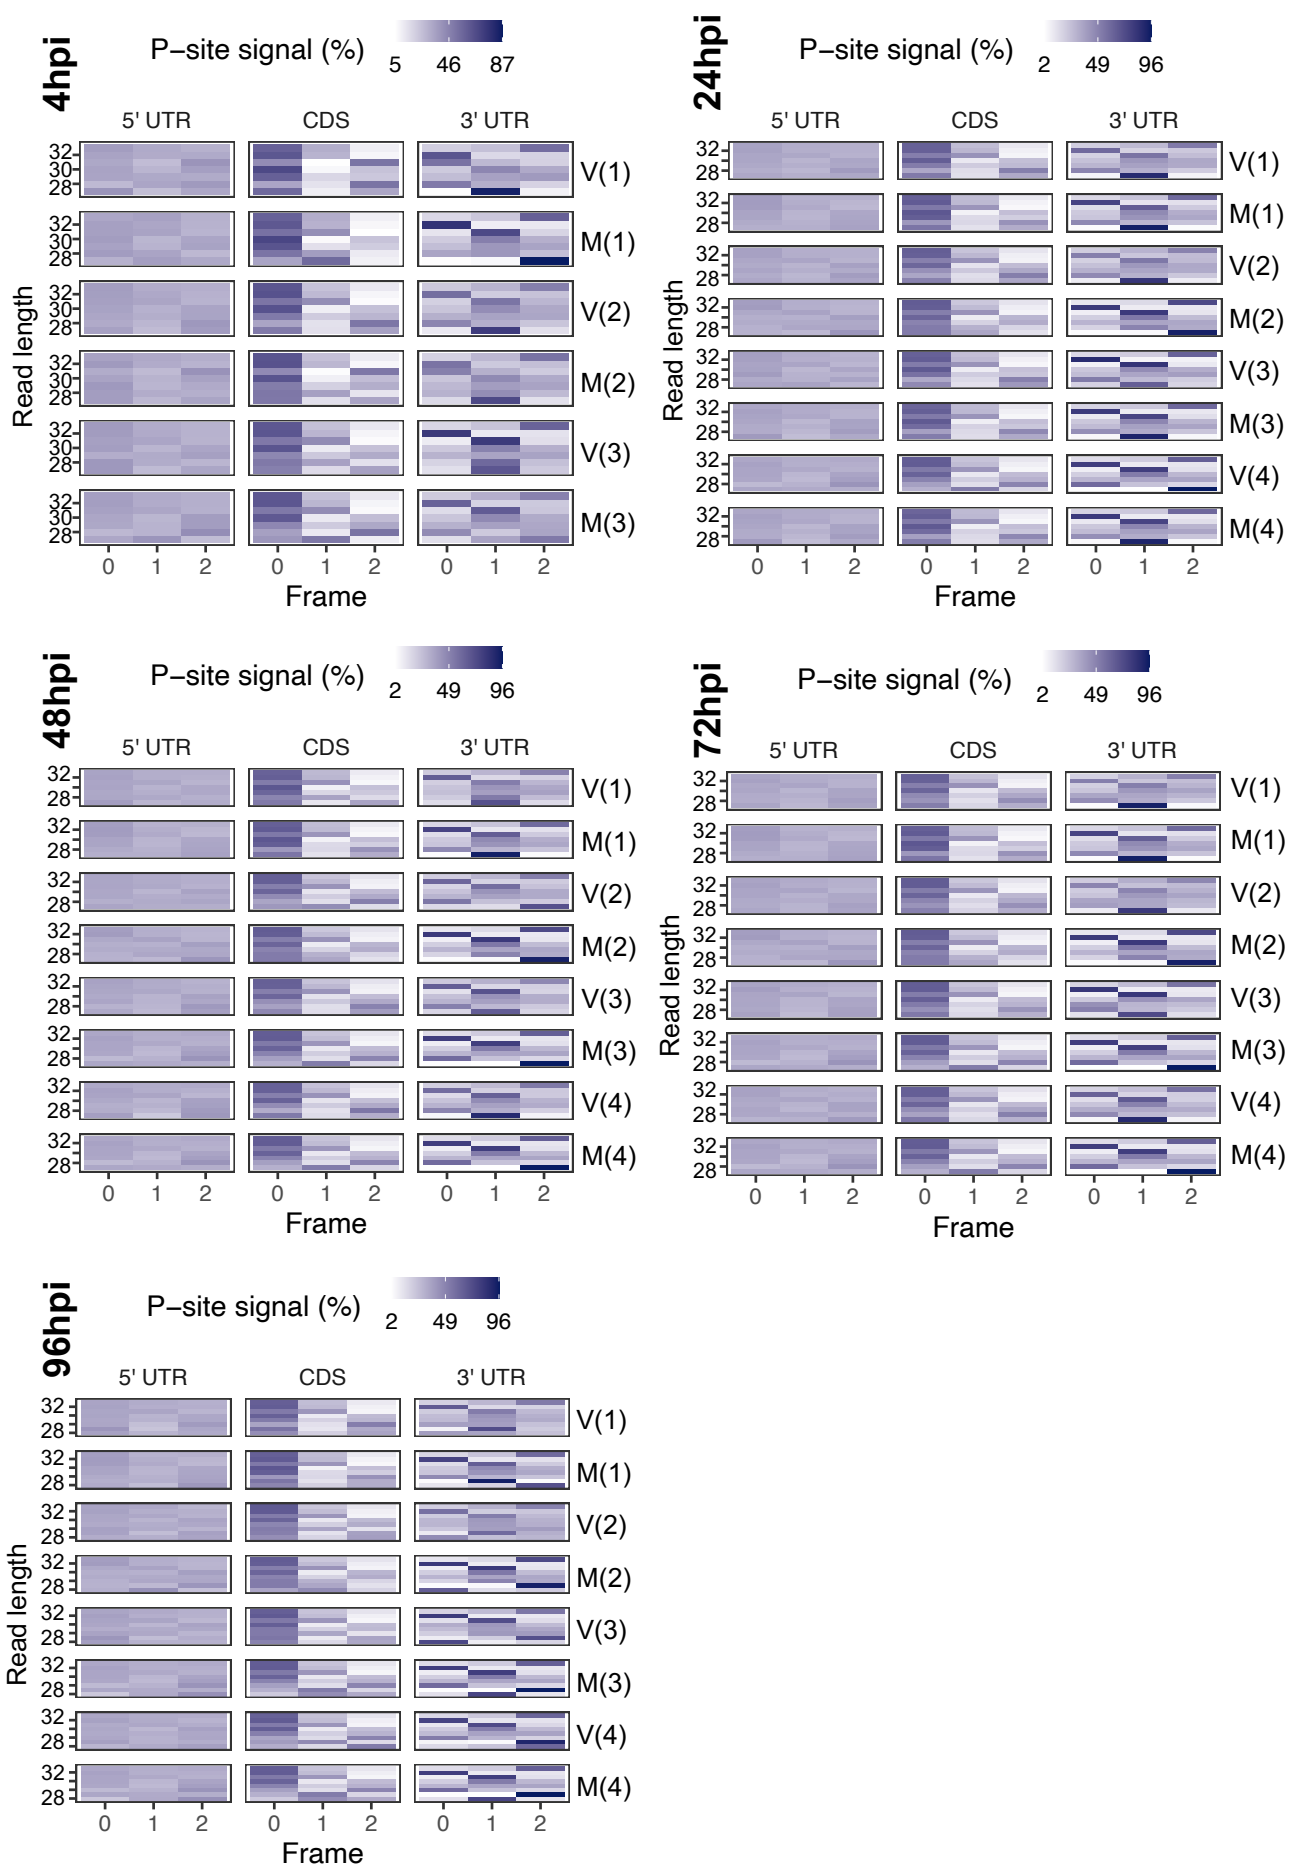

Figure S12

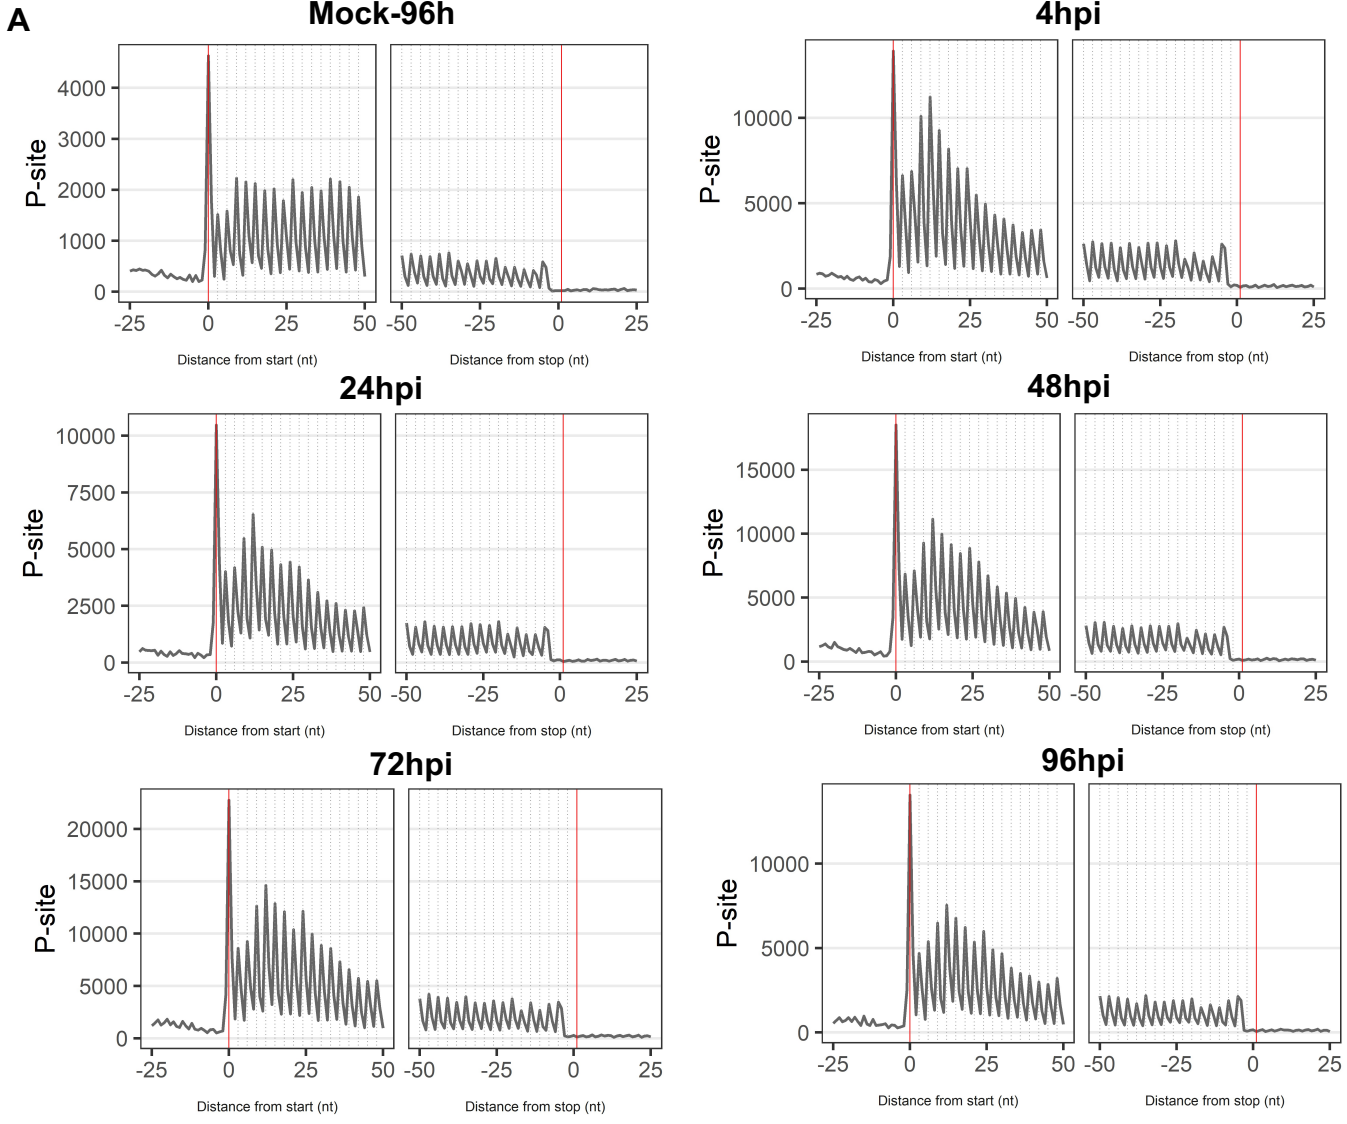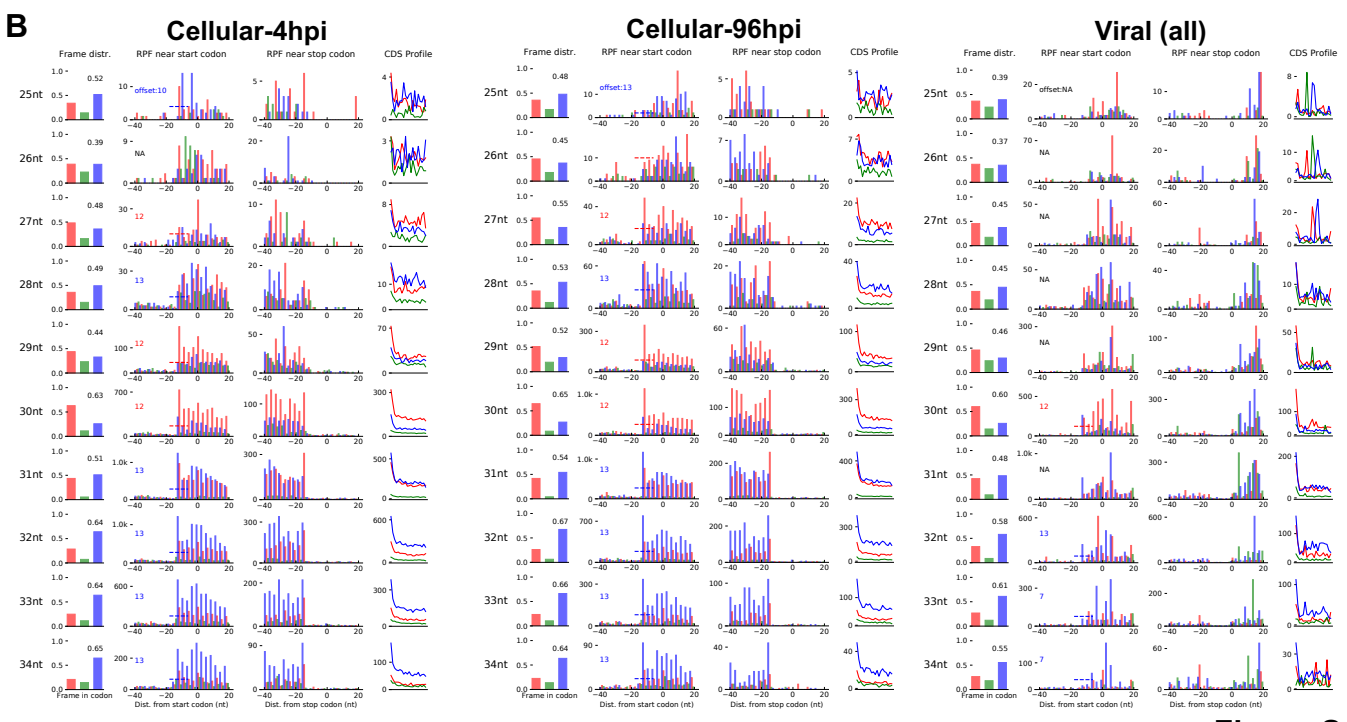

**Figure S13**

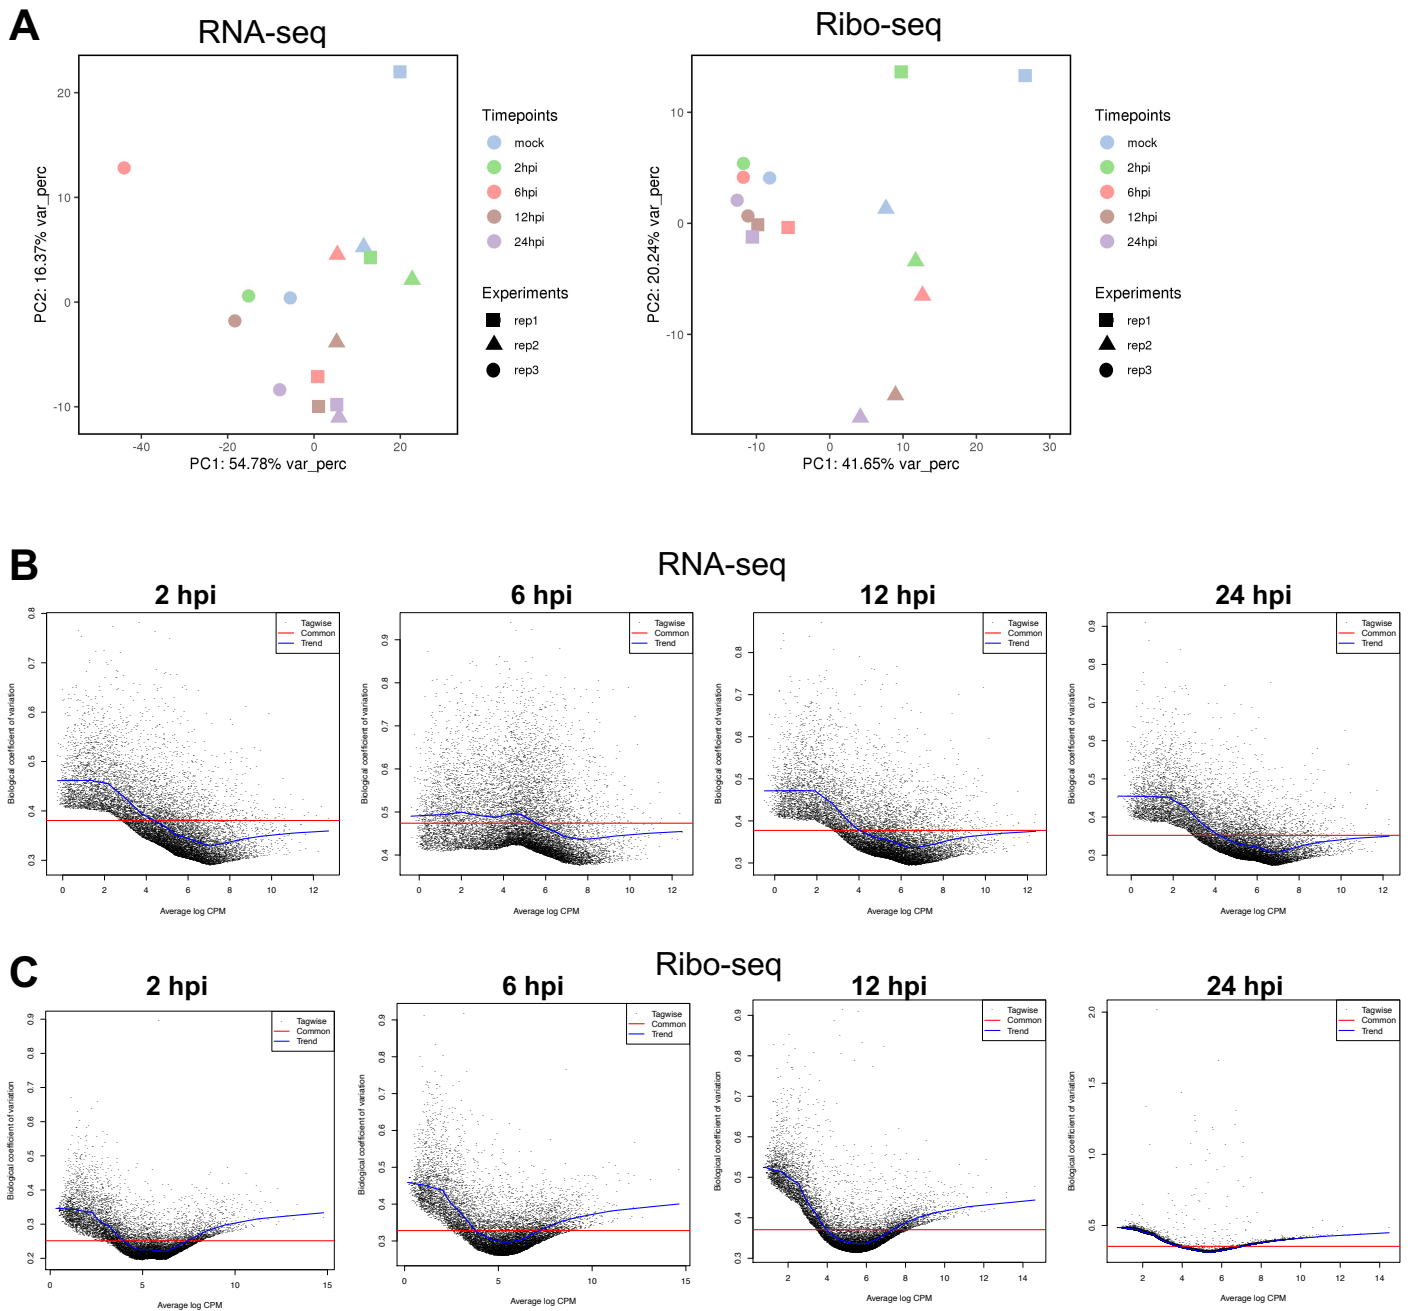

**Figure S14**

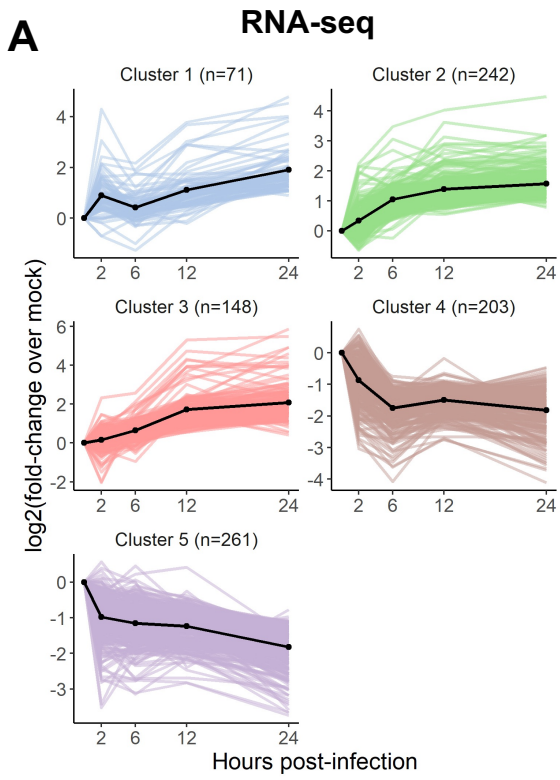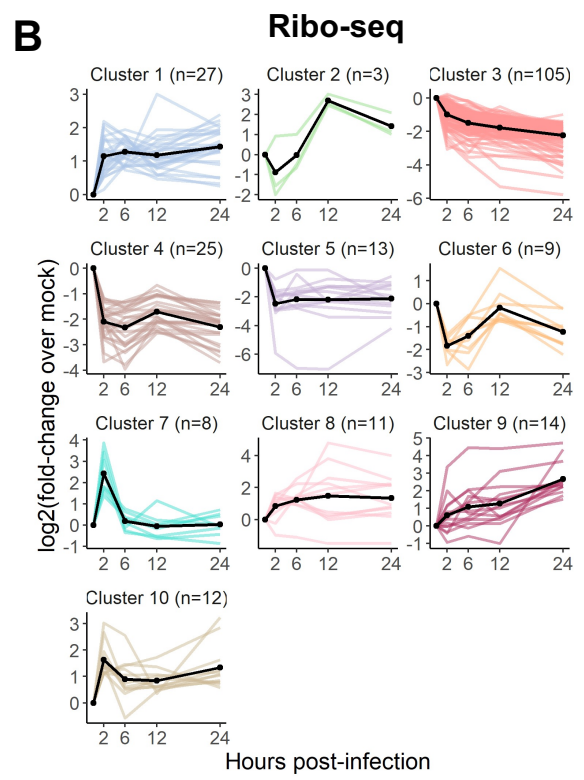

**Figure S15**

# RNA-seq

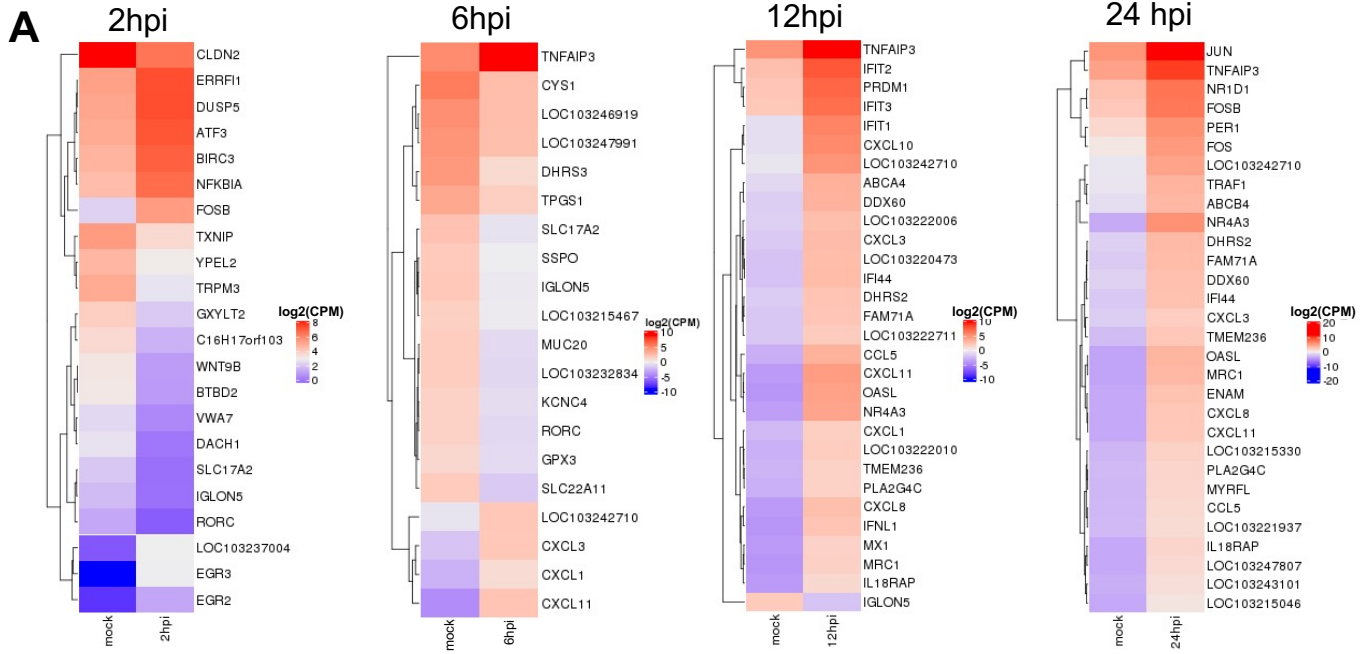

# Ribo-seq

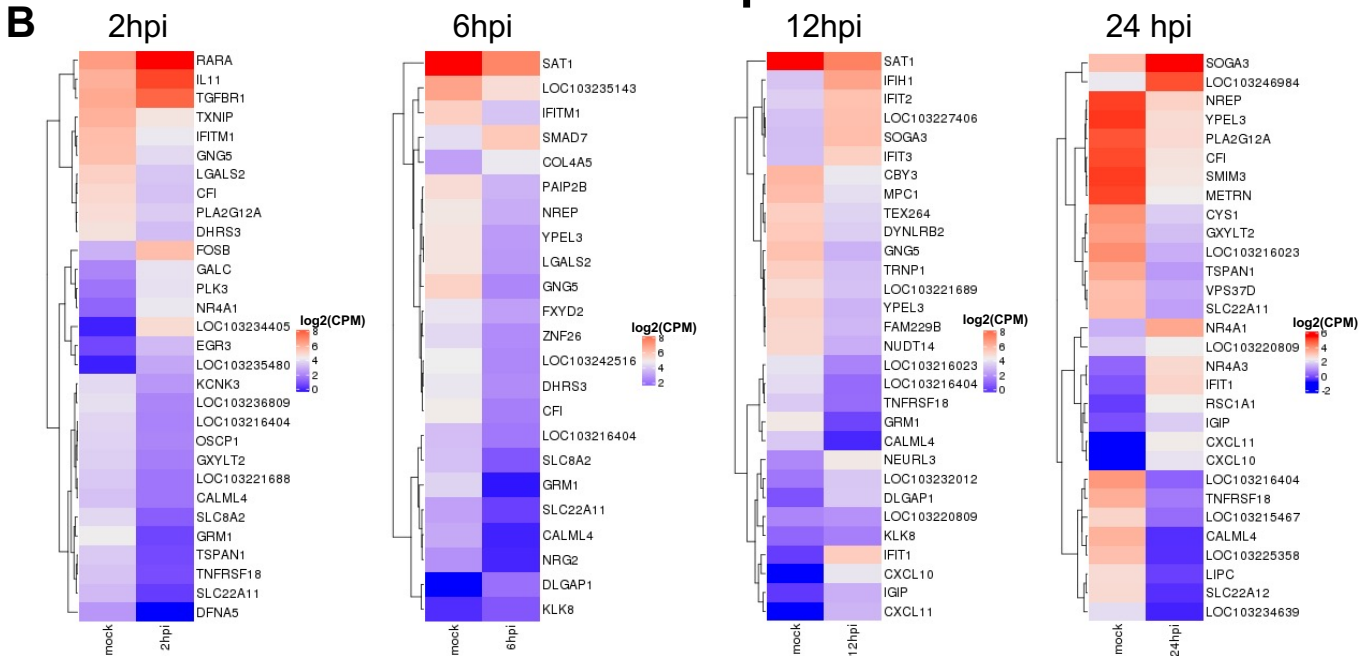

Figure S16



# A RNA-seq

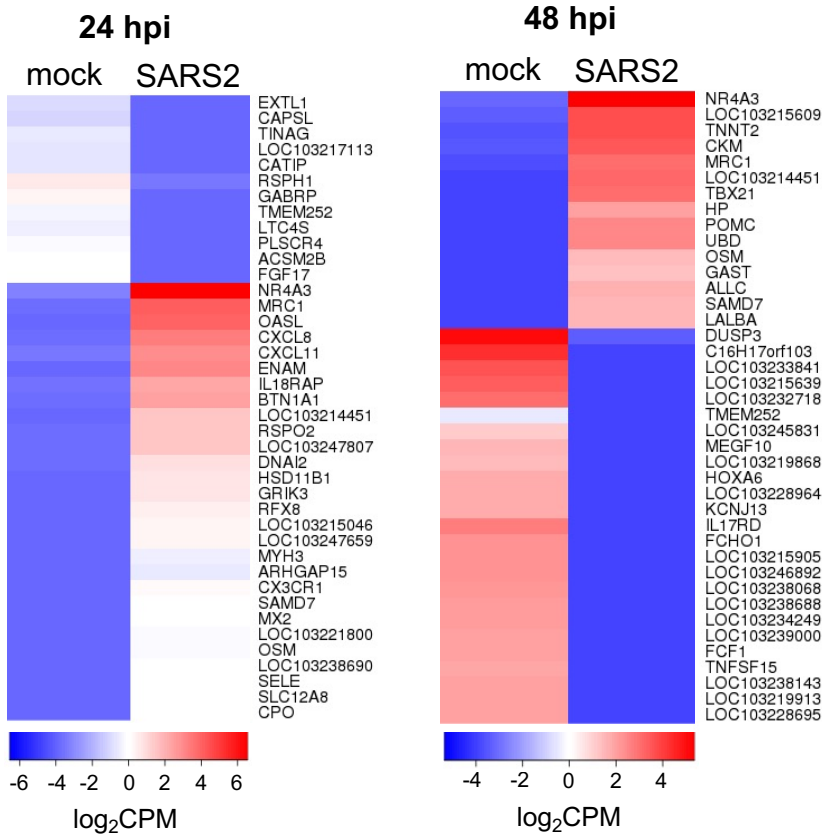

# Ribo-seq

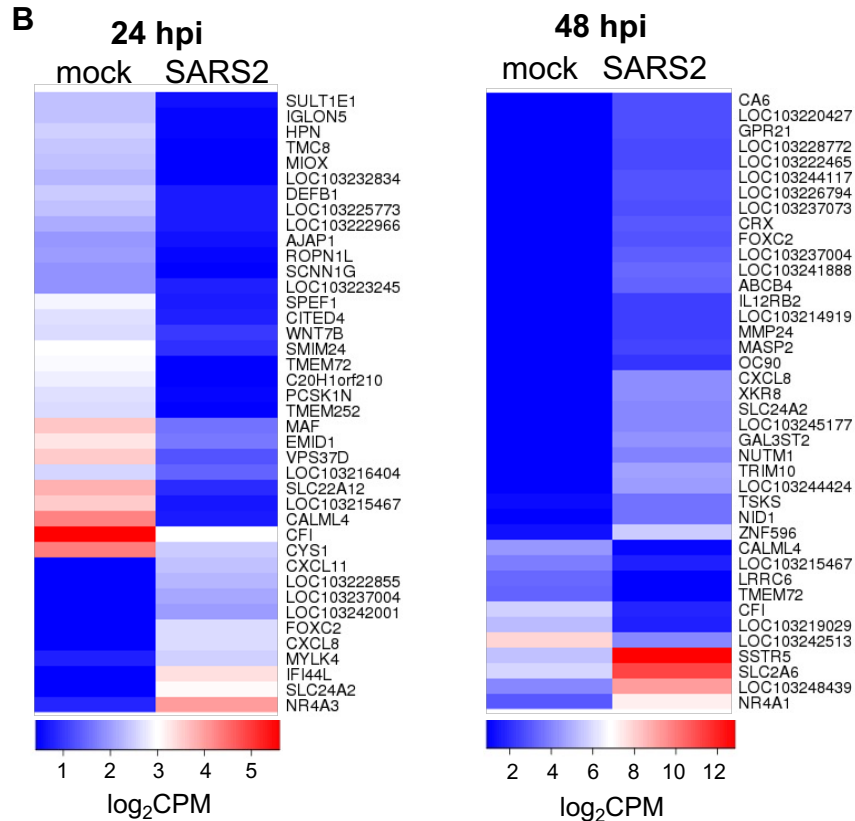

Figure S17

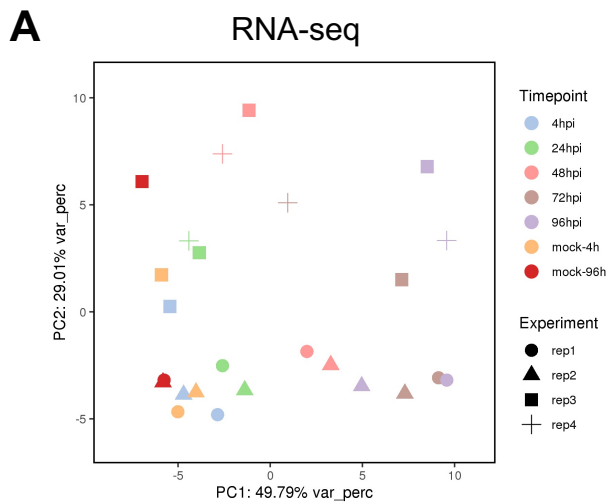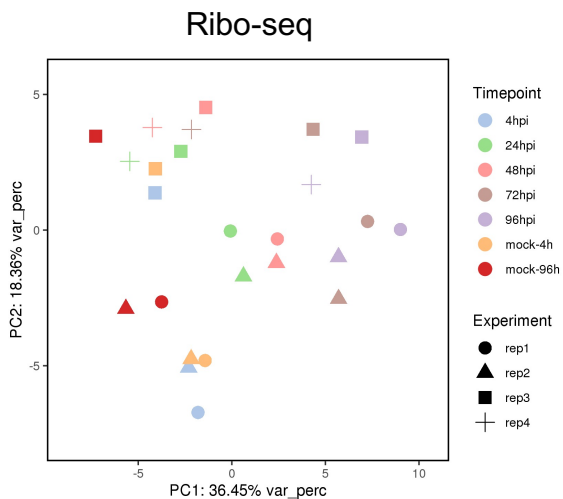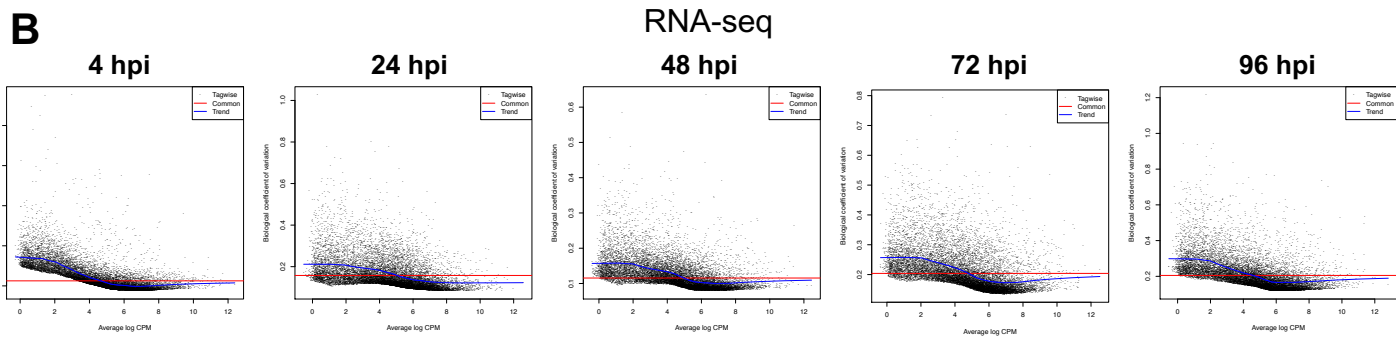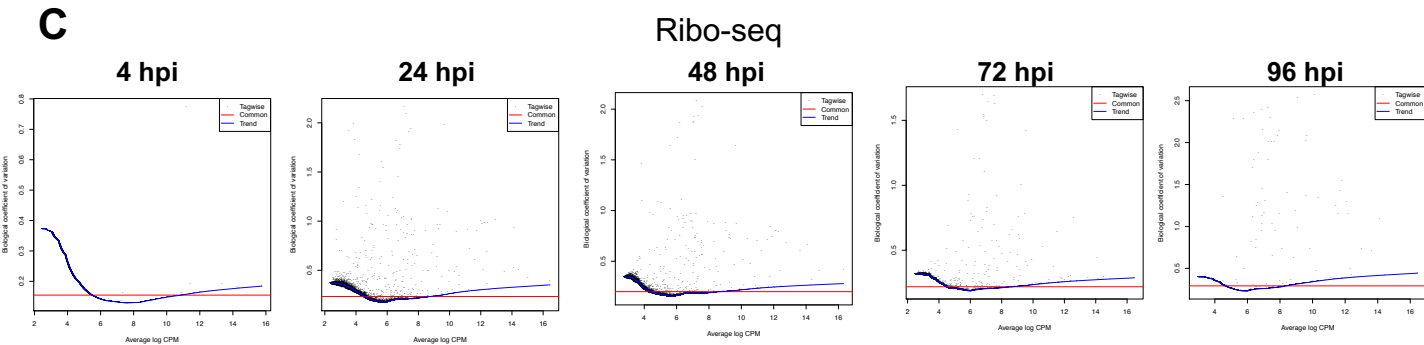

Figure S18

**A****RNA-seq**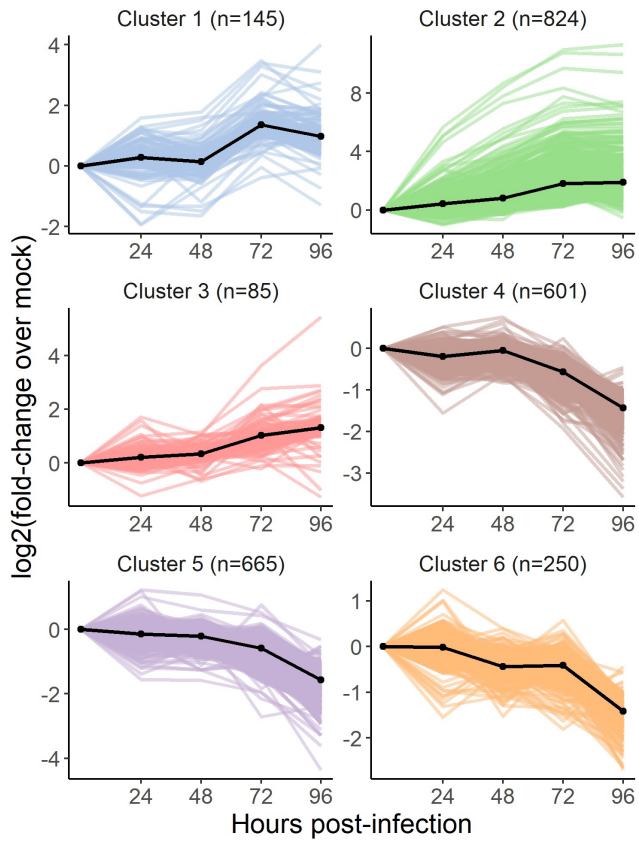**B****Ribo-seq**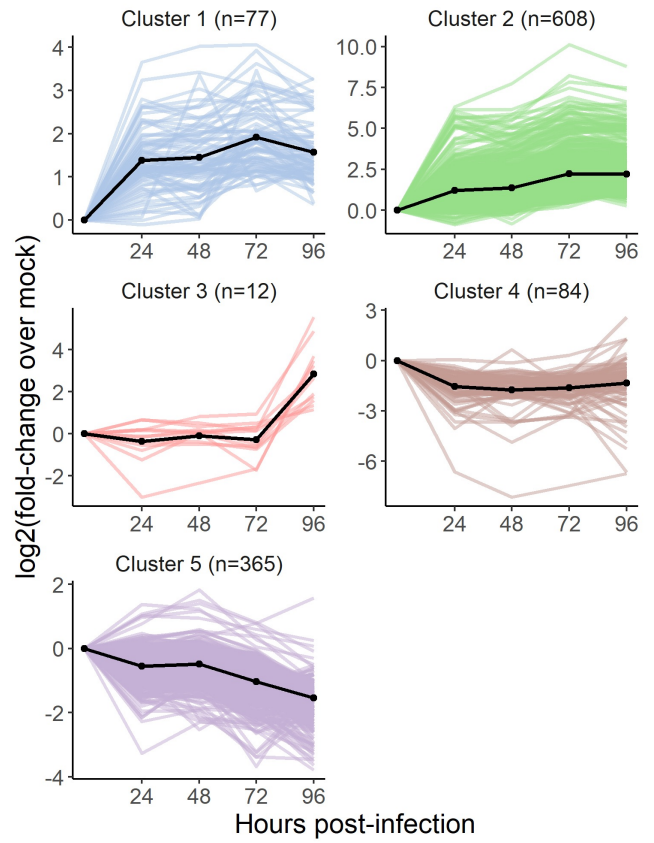**Figure S19**
